# Supplementary material for: Genetic diversity of wild and cultivated Coffea canephora in northeastern DR Congo and the implications for conservation
Source: bioRxiv or medRxiv preprint supplement (doi:10.1101/2021.08.09.455630), 2021-08-10
Supplement: Supplementary file [file media-1.pdf]

| <i>Locus</i>       | <i>Primer sequences (5'-3')</i>                                              | <i>Labelled primer</i> |
|--------------------|------------------------------------------------------------------------------|------------------------|
| <b>Multiplex 1</b> |                                                                              |                        |
| R338               | F: CGAAGGCTGTCAACAACCTGG<br>R: <u>TGTAAAACGACGGCCAGTGGGATAAACAAGTTAAAGGA</u> | Q1-6-FAM               |
| SSR146             | F: TCCAGTTTGATCAGCAACCA<br>R: <u>TGTAAAACGACGGCCAGTCCATCTTGGGGATAGAGCAA</u>  | Q1-6-FAM               |
| R278               | F: TGTAGATTTGAAACCCAATC<br>R: <u>CACTGCTTAGAGCGATGCAAGTCTCGACAAGTTTTGAC</u>  | Q3-VIC                 |
| R339               | F: ATTATGCTCGCTGGGCTGTT<br>R: <u>CACTGCTTAGAGCGATGCTGGGATCACTCCTGTGTGCG</u>  | Q3-VIC                 |
| R336               | F: TTGCCTTTTTAGTGCGTGTA<br>R: <u>CTAGTTATTGCTCAGCGGTGCAAAGCCCCGAGGATT</u>    | Q4-PET                 |
| <b>Multiplex 2</b> |                                                                              |                        |
| R325               | F: CCTTGTTGTTGGGGAATGTC<br>R: <u>TGTAAAACGACGGCCAGTGGCTGTTCTGGGCTTTGTG</u>   | Q1-6-FAM               |
| SSR196             | F: ATCCCCATCAGAAGACCTCA<br>R: <u>TGTAAAACGACGGCCAGTCTCCACCGCCTGTTTATTA</u>   | Q1-6-FAM               |
| R268               | F: GTATCCCACAATGAAATCAC<br>R: <u>TAGGAGTGCAGCAAGCATAGTAGAATTTCAACATATAAG</u> | Q2-NED                 |
| R168               | F: CCTGGACTGGTAGAAACAAA<br>R: <u>CTAGTTATTGCTCAGCGGTAAGGTGTTCAATGCCTACA</u>  | Q4-PET                 |
| <b>Multiplex 3</b> |                                                                              |                        |
| R189               | F: GGAGTGAGAGGAGGGCGTAG<br>R: <u>TGTAAAACGACGGCCAGTGAGAGAGGGACACTGCTGC</u>   | Q1-6-FAM               |
| SSR495             | F: TCGGCTCCCAAATATTCATC<br>R: <u>CTAGTTATTGCTCAGCGGTCATGAGGCAAGAGGGTTTGT</u> | Q4-PET                 |
| SSR497             | F: AGGCTTGCTGGAACCTTGA<br>R: <u>CACTGCTTAGAGCGATGCGAAAGACTTGTCCTTTGCCG</u>   | Q3-VIC                 |
| R175               | F: GCAGTGACGCAGCAATG<br>R: <u>TAGGAGTGCAGCAAGCATAAAAGGAGAGCCAAAGCAGT</u>     | Q2-NED                 |
| <b>Multiplex 4</b> |                                                                              |                        |
| R250               | F: GCATCATTGGGTTGGTGG<br>R: <u>TGTAAAACGACGGCCAGTCGACTTTCCGCACGCAAAC</u>     | Q1-6-FAM               |
| R148               | F: CGTCGTTGAGGACTTGTTG<br>R: <u>CACTGCTTAGAGCGATGCTTCGCAATCCCAGACCC</u>      | Q3-VIC                 |
| SSR209             | F: GCCGTGGTGGAAAGATGTACT<br>R: <u>CACTGCTTAGAGCGATGCCGAGTTCACCAAGAACGTCA</u> | Q3-VIC                 |
| R342               | F: GCGAGAATAAGGAGTGACC<br>R: <u>TAGGAGTGCAGCAAGCATGTCCCTTTTGTCTGGACC</u>     | Q2-NED                 |
| SSR533             | F: ATCTCCTCGTCTTCCCCAT<br>R: <u>CTAGTTATTGCTCAGCGGTGCTTGTAGCAGGCAGGAAAC</u>  | Q4-PET                 |
