# Supplementary material for: Genetic diversity of wild and cultivated Coffea canephora in northeastern DR Congo and the implications for conservation
Source: bioRxiv or medRxiv preprint supplement (doi:10.1101/2021.08.09.455630), 2021-08-10

L(K) (mean  $\pm$  SD)

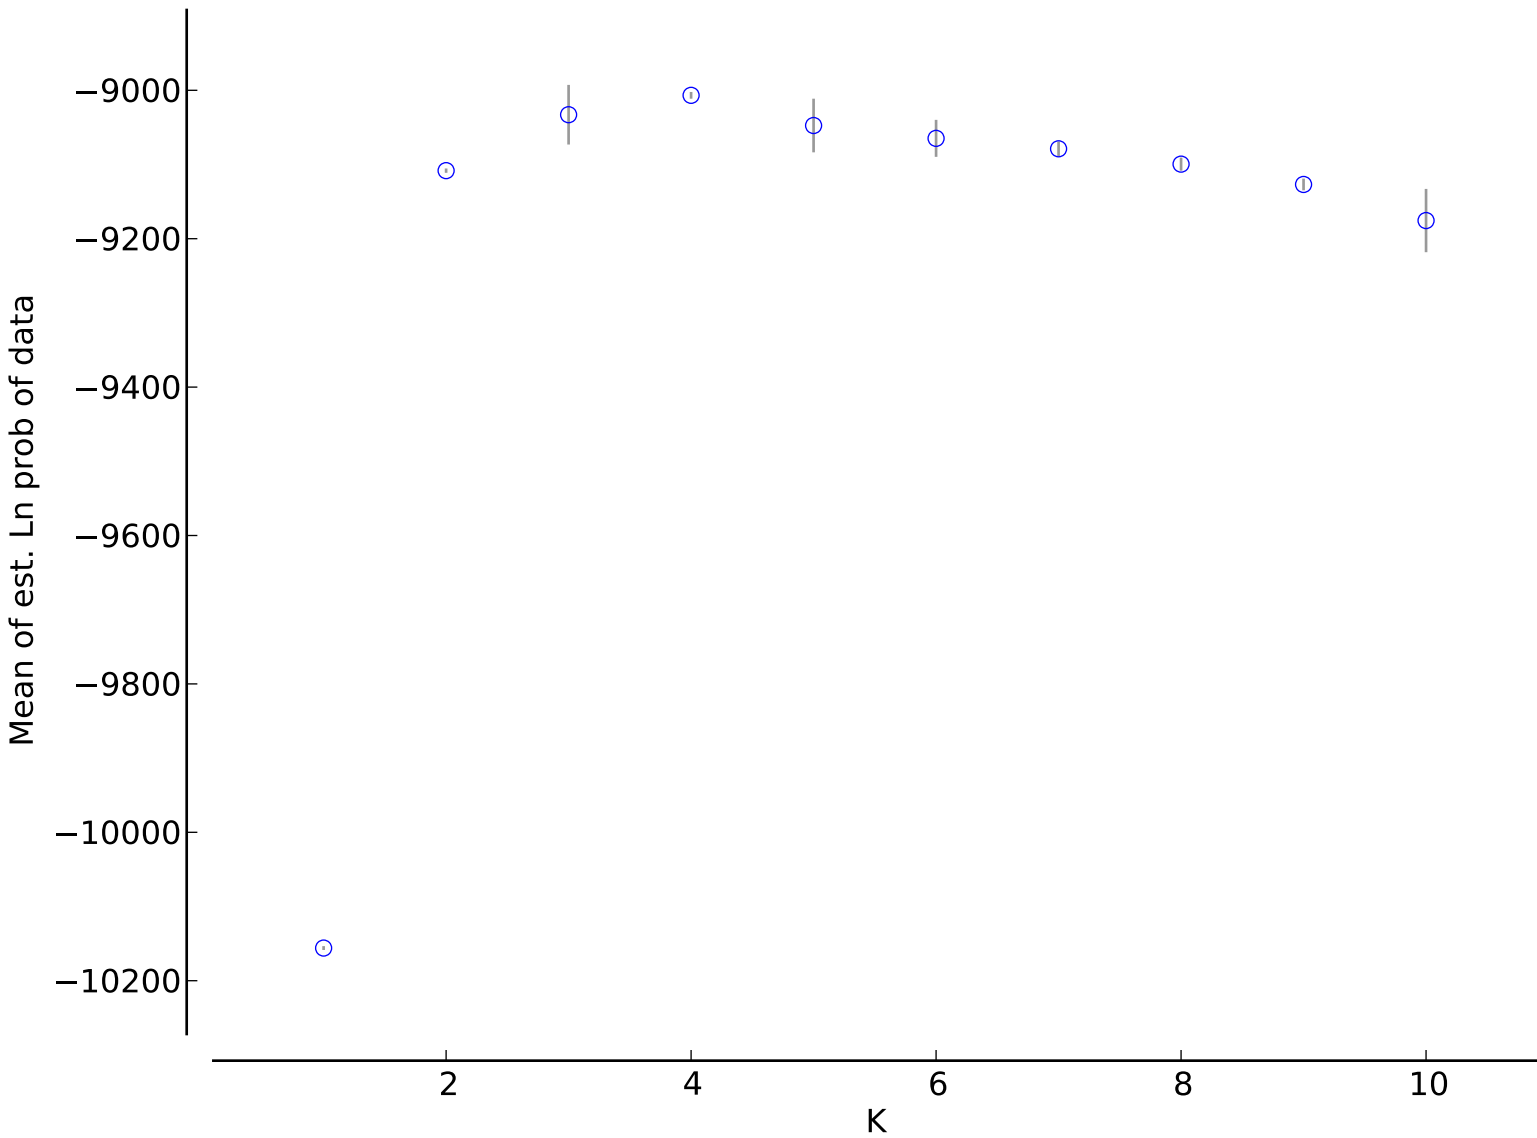

Supplement: Supplementary file [file media-3.pdf]
